# Diabetes and Driving: What Restrictions Should Be Placed on People With Diabetes, and What Is Fueling This Controversy?

Joseph Largay, PAC, CDE

**W**e have all seen the news story: person with diabetes crashes car. If the accident was indeed related to diabetes, it was most likely the result of a severe hypoglycemic event. It is also more than likely that the person has hypoglycemia unawareness resulting from hypoglycemia-associated autonomic failure. In other words, he or she no

longer experiences any warning signs of hypoglycemia.

In my experience, this condition is more prevalent in the type 1 diabetic population.

I recently reviewed the American Diabetes Association (ADA) position statement "Diabetes and Driving"<sup>1</sup> (available from <http://care.diabetesjournals.org/content/35/>

Supplement\_1/S81. full.pdf) and thought I would share some of the most interesting points of this document.

Numerous parties are particularly interested in this topic. Some have concerns that hypoglycemia, retinopathy, and neuropathy may impair a person's ability to drive safely. Others worry that people with

## Clinical Diabetes

### Editor

David F. Kruger, MSN,  
APN-BC, BC-ADM

### Deputy Editors

Virginia Valentine, CNS,  
BC-ADM, CDE  
John R. White, Jr., PA-C,  
PharmD

### Associate Editors

Arti Bhan, MD  
John E. Brunner, MD  
Stephen Brunton, MD  
Robert J. Chilton, MD, FACC  
Joseph Largay, PAC, CDE  
Gayle M. Lorenzi, RN, CDE  
Melinda Downie Maryniuk,  
MED, RD, CDE, FADA  
Heather Remtema, MPH, RD,  
CCRP

### Editorial Board

Christine Beebe, MS  
Nathaniel G. Clark, MD,  
MS, RD  
Kelly Close, BA, MBA  
Nancy J. D'Hondt, RPh,  
CDE, FADE  
Julie A. Hendrix, MD  
Ruth P. Hertzman-Miller,  
MD, MPH  
Debbie Hinnen, ARNP,  
BC-ADM, CDE, FAAN,  
FADE  
Sharon Lahiri, MD  
Brian Lake, DO  
Catherine L. Martin, MS,  
RN, BC-ADM, CDE  
Lucia M. Novak, MSN,  
ANP-BC, BC-ADM  
Kyle Peters, PharmD,  
BC-ADM, CDE  
Thomas Repas, DO, FACP,  
FACOI, FNLA, FACE, CDE  
Terry Ridge, DNP, ANP-BC,  
BC-ADM, CRCC  
Joanne Rinker, MS, RD,  
CDE, LDN  
Melissa Roman, MSN,  
FNP-BC, BC-ADM  
Neil Skolnik, MD  
Condit F. Steil, PharmD,  
CDE, FAPhA  
Curtis Triplett, PharmD, CDE  
Patti Urbanski, MED, RD,  
LD, CDE  
Hussein Yassine, MD

**Managing Director,  
Scholarly Journals**  
Christian S. Kohler

**Director, Scholarly Journals**  
Heather Norton

**Manager, Periodicals  
Production**  
Keang Hok

**Managing Editor**  
Debbie Kendall

**Vice President, Membership  
& Direct Response Marketing**  
Richard Erb

**Vice President, Corporate  
Alliances**  
Nancy Stinson Harris

**Advertising Manager**  
Julie DeVoss Graff  
**Associate Director,  
Billing & Collections**  
Laurie Ann Hall

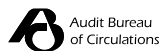

Audit Bureau  
of Circulations

American Diabetes  
Association Officers

**Chair of the Board**  
Karen D. Talmadge, PhD

**President, Health Care  
& Education**  
Lurelean B. Gaines, RN, MSN

**President, Medicine & Science**  
John E. Anderson, MD

**Secretary/Treasurer**  
Patrick L. Shuler, CPA

**Chair of the Board-Elect**  
Dwight Holing

**President-Elect, Health  
Care & Education**  
Marjorie Cypress, PhD, RN,  
CNP, CDE

**President-Elect,  
Medicine & Science**  
Elizabeth R. Seaquist, MD

**Secretary/Treasurer-Elect**  
Robert J. Singley, MBA

**Vice Chair of the Board**  
Janel L. Wright, JD

**Vice President, Health  
Care & Education**  
David G. Marrero, PhD

**Vice President, Medicine  
& Science**  
Samuel Dagogo-Jack, MD,  
FRCP

**Vice Secretary/Treasurer**  
Richard Farber, MBA

**Chief Executive Officer**  
Larry Hausner, MBA

A PUBLICATION OF THE AMERICAN DIABETES ASSOCIATION®, INC. <sup>TM</sup>

### Clinical Diabetes Mission Statement

The mission of *Clinical Diabetes* is to provide primary care providers and all clinicians involved in the care of people with diabetes with information on advances and state-of-the-art care for people with diabetes. *Clinical Diabetes* is also a forum for discussing diabetes-related problems in practice, medical-legal issues, case studies, digests of recent research, and patient education materials.

### ADA Mission Statement

The mission of the American Diabetes Association is to prevent and cure diabetes and to improve the lives of all people affected by diabetes.

*Clinical Diabetes* (Print ISSN 0891-8929, Online ISSN 1945-4953) is published every January, April, July, and October by the American Diabetes Association®, Inc., 1701 N. Beauregard St., Alexandria, VA 22311. For subscription information, call toll free (800) 232-3472, 8:30 a.m. to 5:00 p.m. EST, Monday through Friday. Outside the U.S., call (703) 549-1500.

Claims for missing issues must be made within 6 months of publication. The publisher expects to supply missing issues free of charge only when losses have been sustained in transit and when the reserve stock permits.

Postmaster: Send change of address to *Clinical Diabetes* COA, 1701 N. Beauregard St., Alexandria, VA 22311-1733.

©American Diabetes Association®, Inc., 2013.  
Printed in the USA.

*Opinions expressed in signed articles are those of the authors and are not necessarily endorsed by the American Diabetes Association.*

### Advertising Representatives

**Consumer Northeast/Southeast/West**  
Nancy Greenwald, Vice President, Advertising Sales  
& Custom Media, TMG Custom Media,  
[ngreenwald@adamediasales.com](mailto:ngreenwald@adamediasales.com), (646) 783-3786

### Consumer Midwest

Lauren Loomis, [lloomis@adamediasales.com](mailto:lloomis@adamediasales.com);  
TMG Custom Media, (920) 839-1186

### Pharmaceutical

B. Joseph Jackson, [joejackson@jacksongaeta.com](mailto:joejackson@jacksongaeta.com);  
Paul Nalbandian, [paulnalbandian@jacksongaeta.com](mailto:paulnalbandian@jacksongaeta.com);  
Tina Auletta, [jggtina@aol.com](mailto:jggtina@aol.com); Jackson Gaeta Group,  
(973) 403-7677

diabetes are being unnecessarily profiled.

Licensing requirements for driving differ from state to state. Some states do not require any medical documentation, but most require completion of a medical form confirming the driver's ability to safely operate a motor vehicle. I have completed hundreds of these forms for patients with diabetes. Some drivers have been involved in motor vehicle accidents (MVs), but most have not. I can remember only two patients from whom I felt it necessary to temporarily withhold driving privileges because of a recent severe hypoglycemic event.

Interstate commercial drivers must follow federal regulations, but otherwise, private and commercial drivers may be subject to a variety of state-level regulations. Licensing decisions within each state actually may be made by someone who is not a health care professional, but rather an administrator.

MVs related to diabetes are fairly rare. Other conditions such as attention deficit disorder and sleep apnea are associated with similar or higher risks for collisions. Accident risks are also higher for younger drivers and those who drive after midnight.

The challenge seems to be how best to identify patients with diabetes who are at risk for MVs to provide them with preventive education. There are even online programs

that help to educate people with diabetes who are at risk for MVs.

Although most of the restrictions placed on driving apply to people who are using insulin, studies seem to indicate that the most significant risk factor is any recent severe hypoglycemic event.<sup>2</sup> Even moderate hypoglycemia has been shown to impair cognitive functioning and driving ability. It is understandable, therefore, that patients should know what their glucose level is and take measures to correct it, if necessary, before driving. They should also always carry a source of carbohydrate to consume, if necessary, to prevent or treat hypoglycemia if they are to be driving for extended periods.

ADA, in its 2013 Standards of Care document,<sup>3</sup> states that patients who take multiple daily injections of insulin or are on insulin pump therapy should monitor their glucose more frequently. The guidelines suggest monitoring before each meal, occasionally postprandially, at bedtime, before physical activity, and when they think they might have low blood glucose, as well as after treatment for hypoglycemia (to confirm its resolution) and before important tasks such as driving. For some individuals, this could be eight times per day or more.

I find it ironic that, for many patients with diabetes, insurance companies limit the number of test strips they will cover per month,

even though 1) it seems clear that increased monitoring is associated with improved outcomes and 2) we would all like to know that people with diabetes are checking their glucose before getting behind the wheel of a car. I would assume that, for most people, just driving to and from work adds at least two extra tests per day to their self-monitoring regimen. If we are expecting patients to act responsibly and to test before driving, then perhaps insurance companies could facilitate this by increasing their coverage of test strips.

### ACKNOWLEDGMENT

Portions of this article first appeared in a March 2012 Practicing Clinicians' Exchange Daily Post blog entry written by the author.

### REFERENCES

- <sup>1</sup>American Diabetes Association: Diabetes and driving. *Diabetes Care* 36 (Suppl. 1):S80–S85, 2013
- <sup>2</sup>Cox DJ, Ford D, Gonder-Frederick L, Clarke W, Mazze R, Weinger K, Ritterband L: Driving mishaps among individuals with type 1 diabetes: a prospective study. *Diabetes Care* 32:2177–2180, 2009
- <sup>3</sup>American Diabetes Association: Standards of medical care in diabetes—2013. *Diabetes Care* 36 (Suppl. 1):S11–S66, 2013

---

*Joseph Largay, PAC, CDE, is a clinical instructor at the University of North Carolina Diabetes Care Center in Durham, N.C. He is also an associate editor of Clinical Diabetes.*
